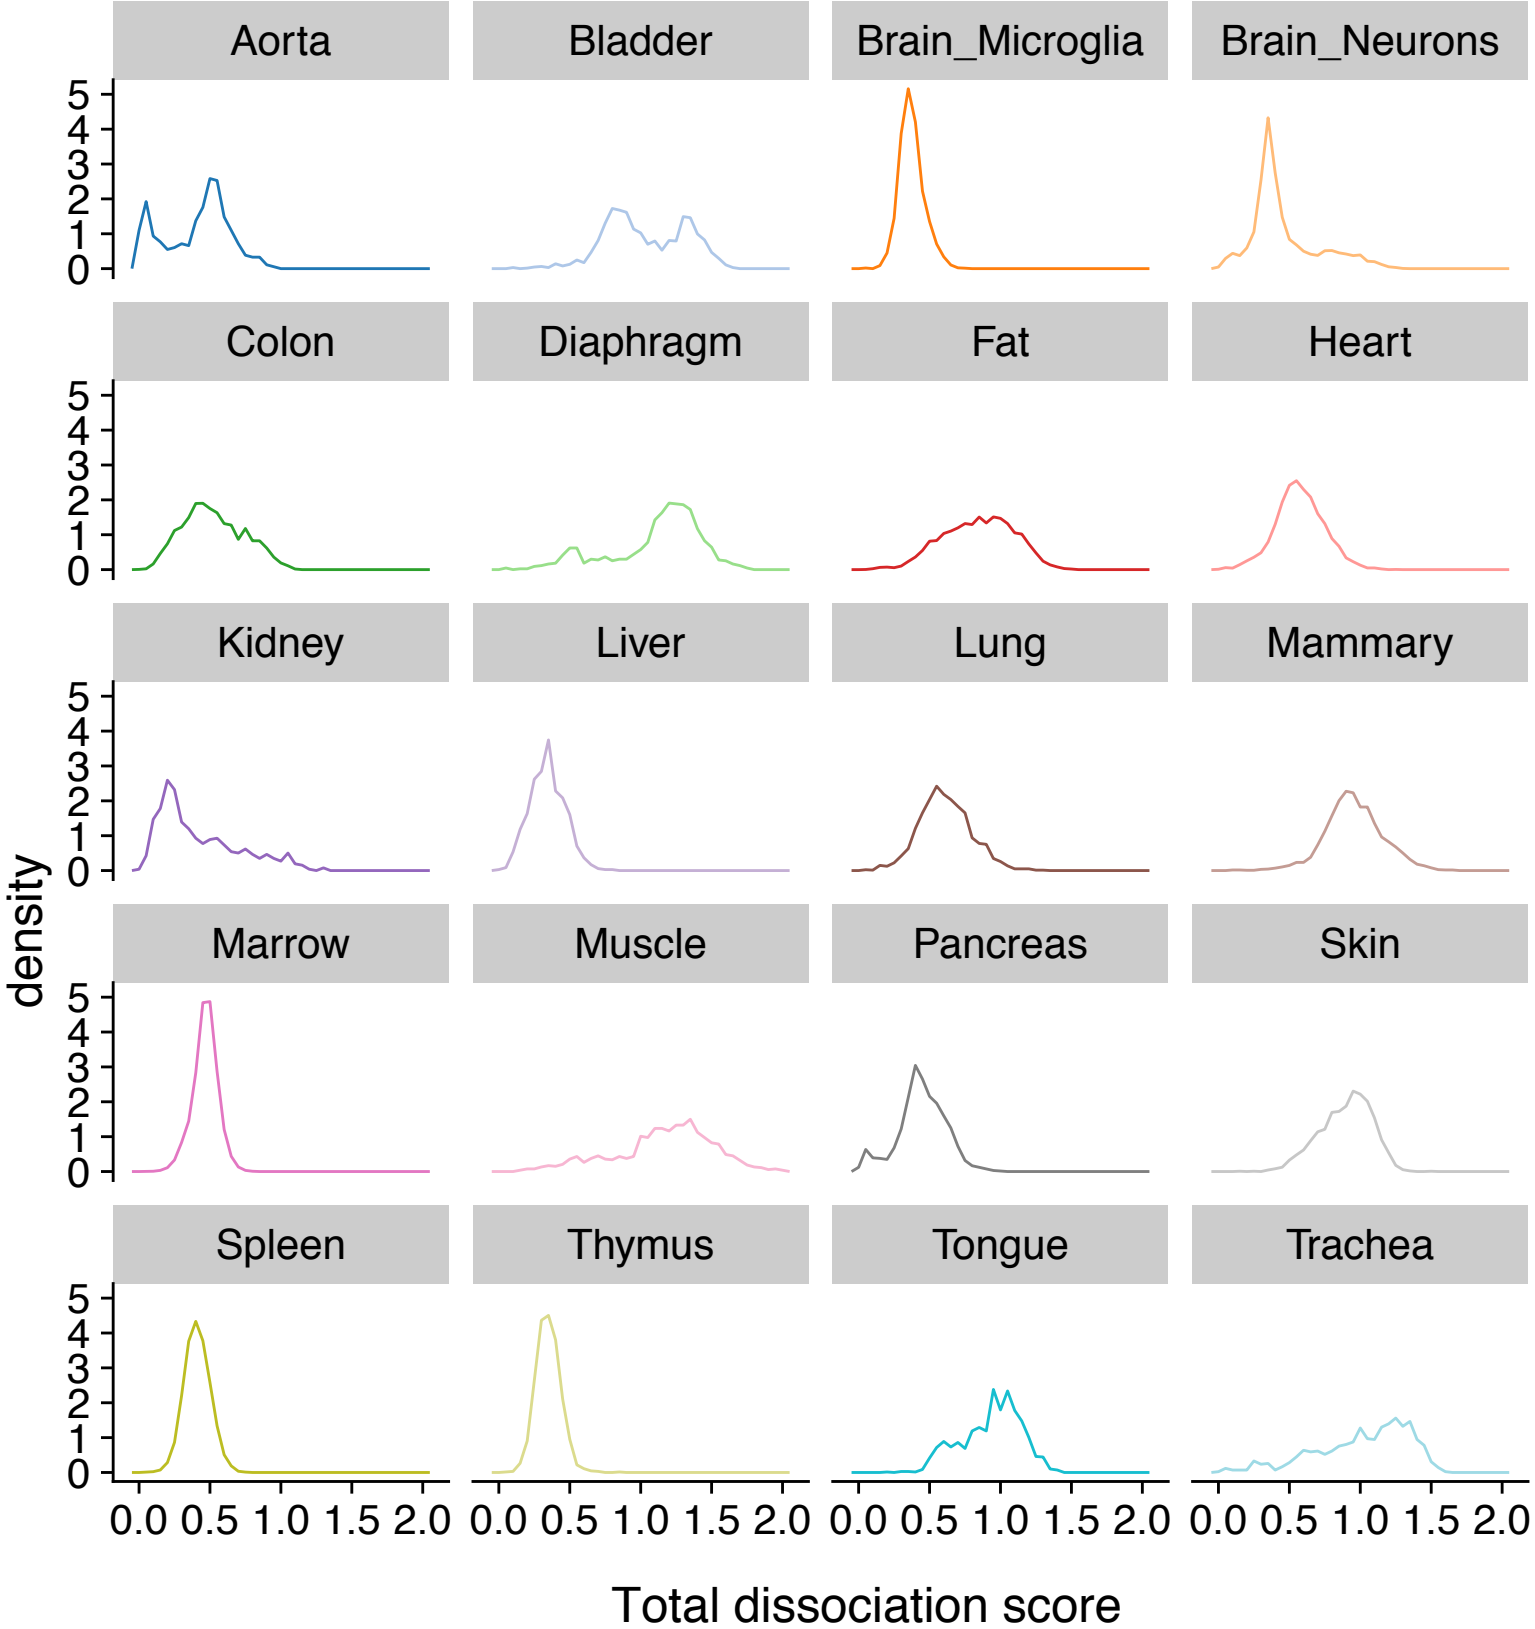

Supplementary Figure 6.
